# Supplementary material
Source: PubMed Central journal article supplement (PMC6376876)
Supplement: NIHMS1517101-supplement-1.pdf [file NIHMS1517101-supplement-1.pdf]

## SUPPORTING INFORMATION

# Crystal Structure of Aldehyde Dehydrogenase 16 Reveals Trans Hierarchical Structural Similarity and a New Dimer

Li-Kai Liu<sup>1</sup> and John J. Tanner<sup>1,2</sup>

Departments of <sup>1</sup>Biochemistry and <sup>2</sup>Chemistry, University of Missouri, Columbia, Missouri 65211, USA

Corresponding author: John J. Tanner, Department of Biochemistry, University of Missouri, Columbia, MO 65211, USA. Tel: (573) 884-1280; Email: [tannerjj@missouri.edu](mailto:tannerjj@missouri.edu).

### Table of Contents

---

|                                                                                        |     |
|----------------------------------------------------------------------------------------|-----|
| Table S1. Data Collection Statistics for LaALDH16.....                                 | S-2 |
| Fig. S1. Model of the nonfunctional NAD <sup>+</sup> -binding site of HsALDH16A1 ..... | S-3 |
| Fig. S2. Catalytic activity of ALDH16 .....                                            | S-4 |

---

**Table S1.** Data Collection Statistics for LaALDH16<sup>a</sup>

|                             |                                                                               |
|-----------------------------|-------------------------------------------------------------------------------|
| Beamline                    | ALS 4.2.2                                                                     |
| Space group                 | <i>P2</i>                                                                     |
| Unit cell parameters (Å, °) | <i>a</i> = 97.9,<br><i>b</i> = 63.1,<br><i>c</i> = 134.1,<br>$\beta$ = 108.9° |
| Wavelength (Å)              | 1.000                                                                         |
| Resolution (Å)              | 63.08-2.95 (3.11-2.95)                                                        |
| Observations                | 116172 (15801)                                                                |
| Unique reflections          | 32443 (4706)                                                                  |
| $R_{\text{merge}}(I)$       | 0.088 (0.627)                                                                 |
| $R_{\text{meas}}(I)$        | 0.122 (0.856)                                                                 |
| $R_{\text{pim}}(I)$         | 0.083 (0.580)                                                                 |
| Mean $I/\sigma$             | 10.5 (1.7)                                                                    |
| Mean $CC_{1/2}$             | 0.996 (0.631)                                                                 |
| Completeness (%)            | 98.4 (98.6)                                                                   |
| Multiplicity                | 3.6 (3.4)                                                                     |

<sup>a</sup>Values for the outer resolution shell of data are given in parentheses.

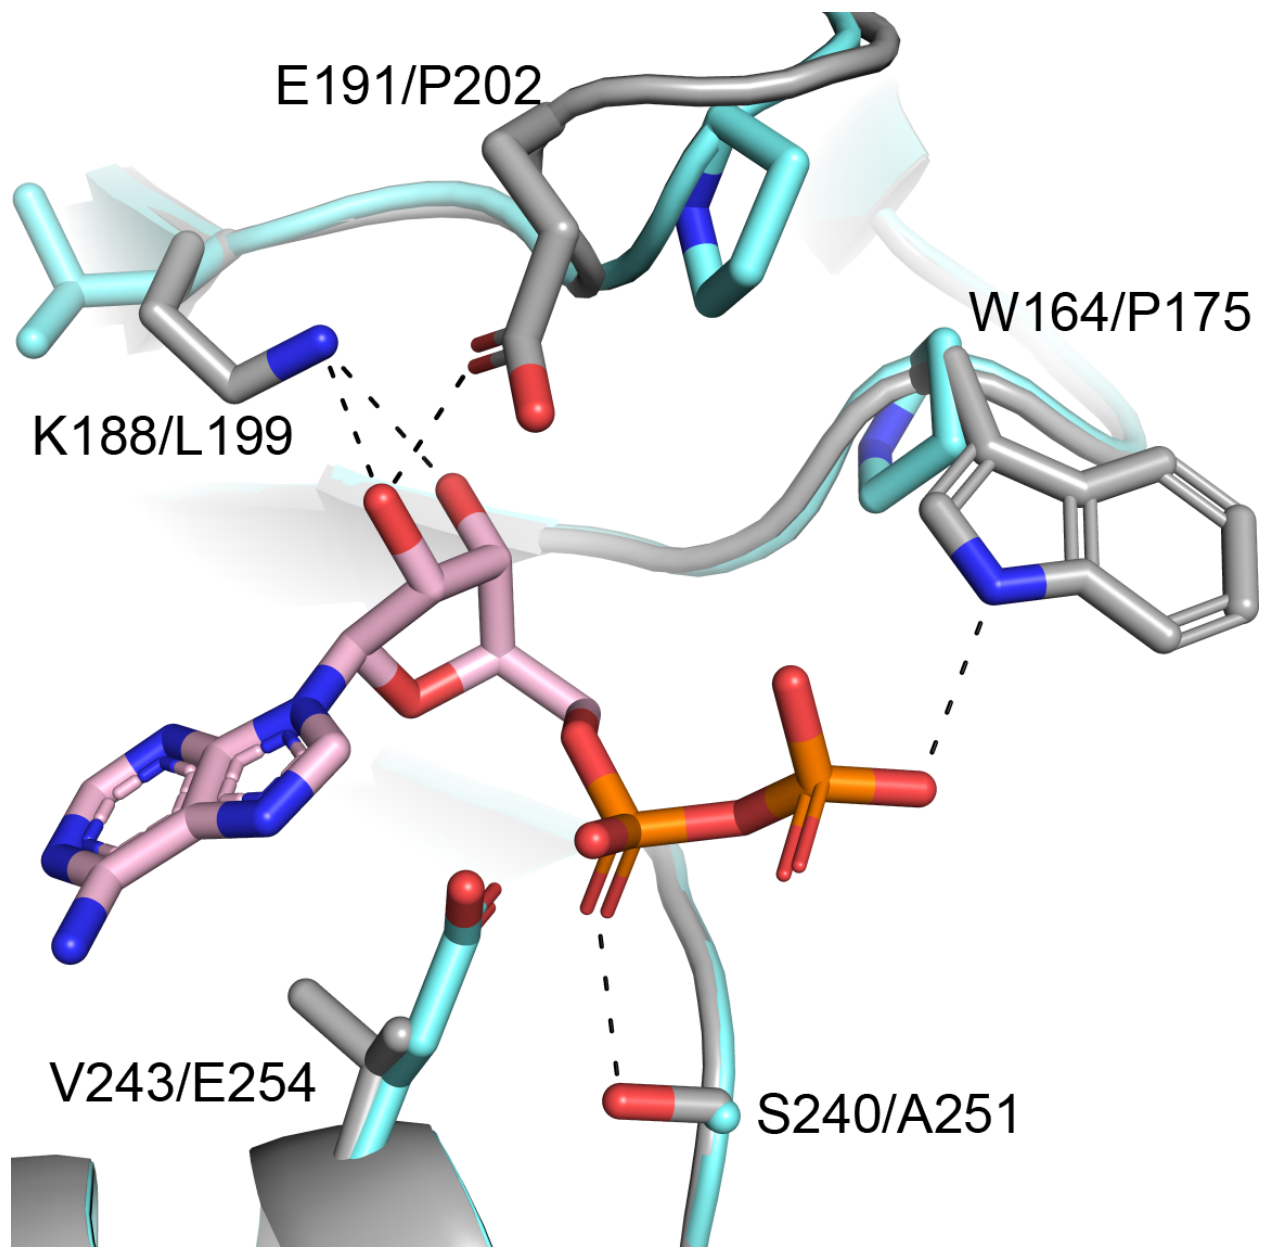

**Fig. S1.** Model of the nonfunctional NAD<sup>+</sup>-binding site of HsALDH16A1. This figure shows a superposition of the crystal structure of LsALDH16-NAD<sup>+</sup> (gray with pink NAD<sup>+</sup>) and a model of HsALDH16A1 generated with SWISS-MODEL (blue). Residues are labeled as LsALDH16/HsALDH16A1.

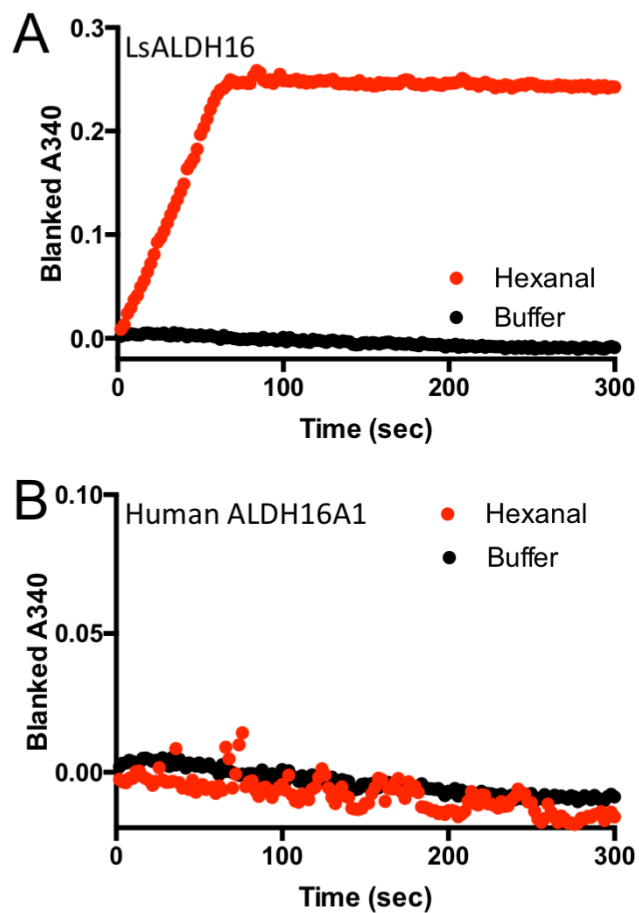

**Fig. S2.** Catalytic activity of ALDH16 monitored by the progress curve of NADH production using hexanal as the substrate in the presence of the cofactor  $\text{NAD}^+$ . (A) LsALDH16 displays ALDH activity. (B) HsALDH16A1 does not display ALDH activity.
